# Supplementary material
Source: MDPI journal article supplement (https://www.mdpi.com/2571-9408/6/3/160)
Supplement: s1 [file s1]

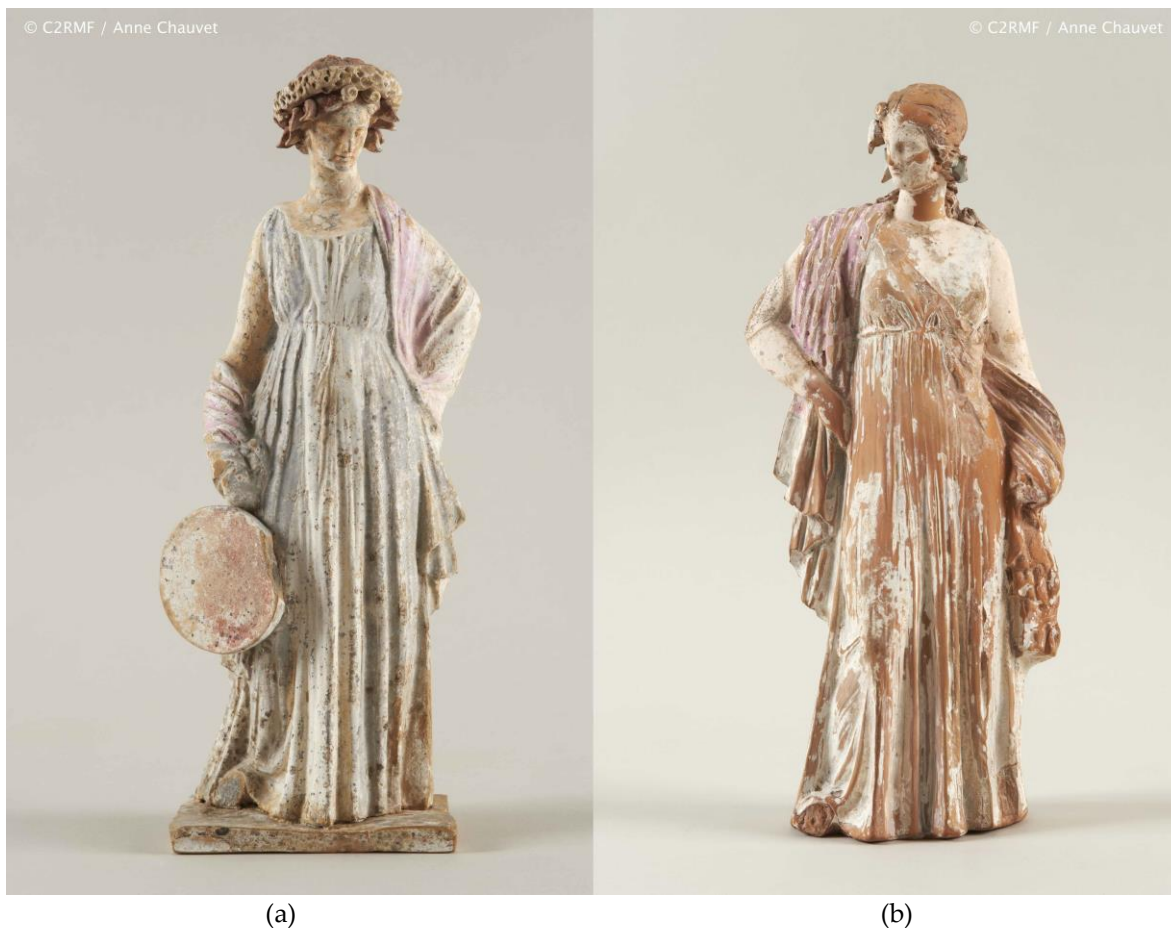

Figure S1: (a). Figurine of Maenad holding a tympanon, so-called «Lady Pozzi», Tanagra, c. 330–300 BCE, painted terracotta, ht. 21.7 cm, Louvre museum, inv. CA 3462. © C2RMF/A. Chauvet. (b). Figurine of Maenad with a nebris, so-called «Lady Baillehache», Attica, c. 330–300 BCE, painted and gilded terracotta, ht. 27.5 cm, Louvre museum, inv. Heritage 2023, 6 3023CA 2552. © C2RMF/A. Chauvet.

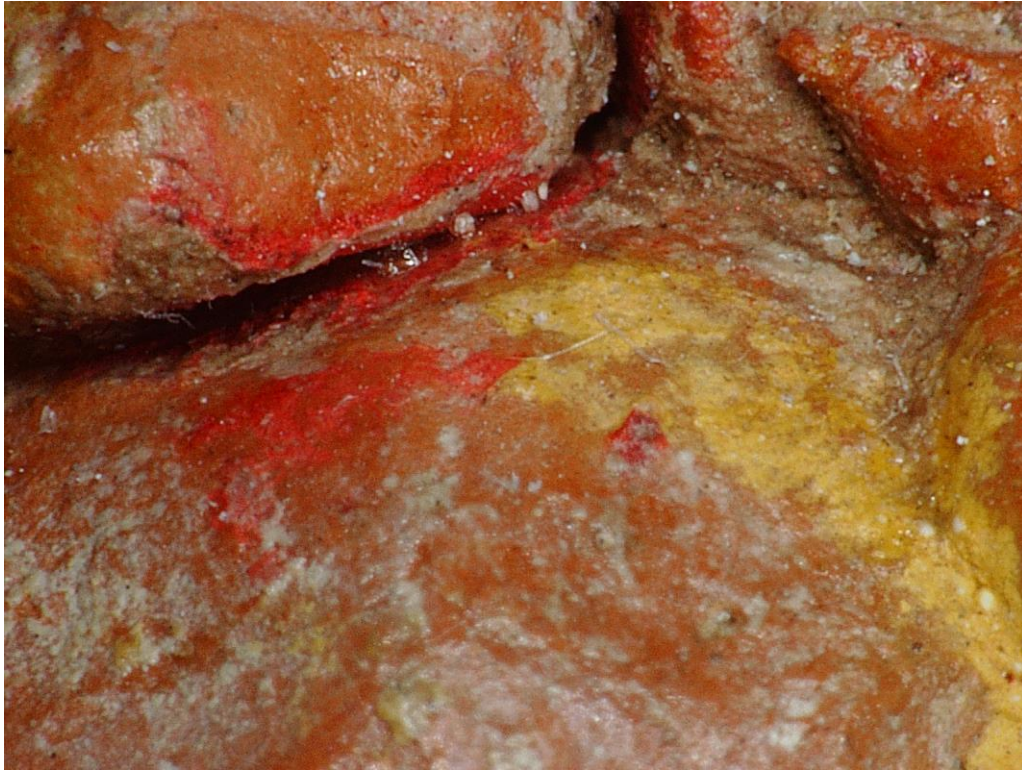

Figure S2: Fruit on the headdress. Microphotograph ( $\times 60$ ) of an intense red paint, likely cinnabar, and yellow ground for gilding. © C2RMF/B. Bourgeois.

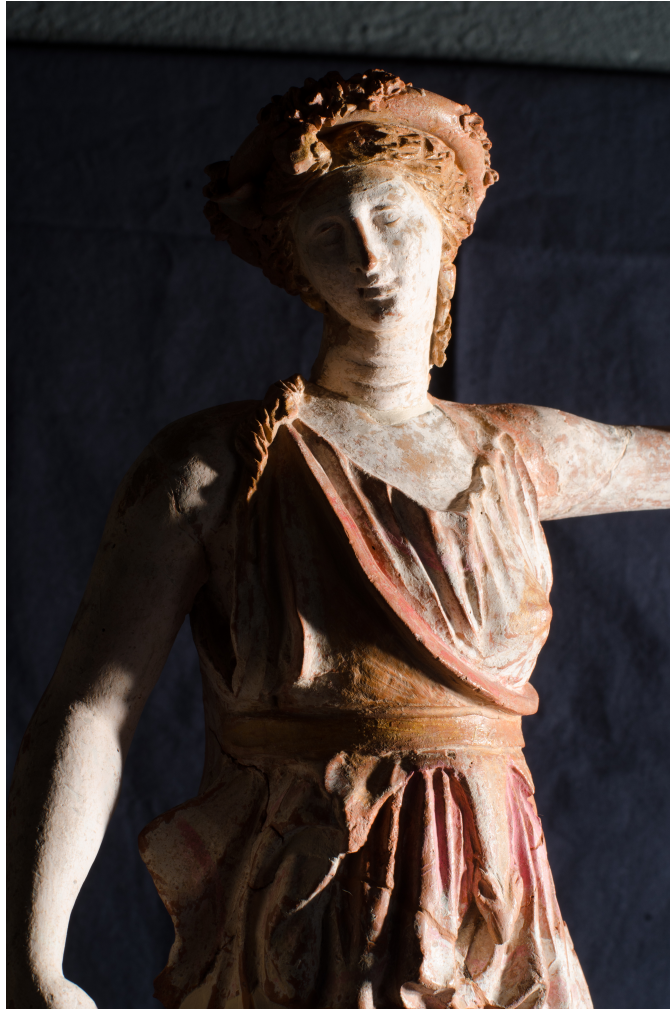

Figure S3: Maenad in raking light © G. Verri
