# Supplementary material
Source: MDPI journal article supplement (https://www.mdpi.com/2571-9408/6/3/160)

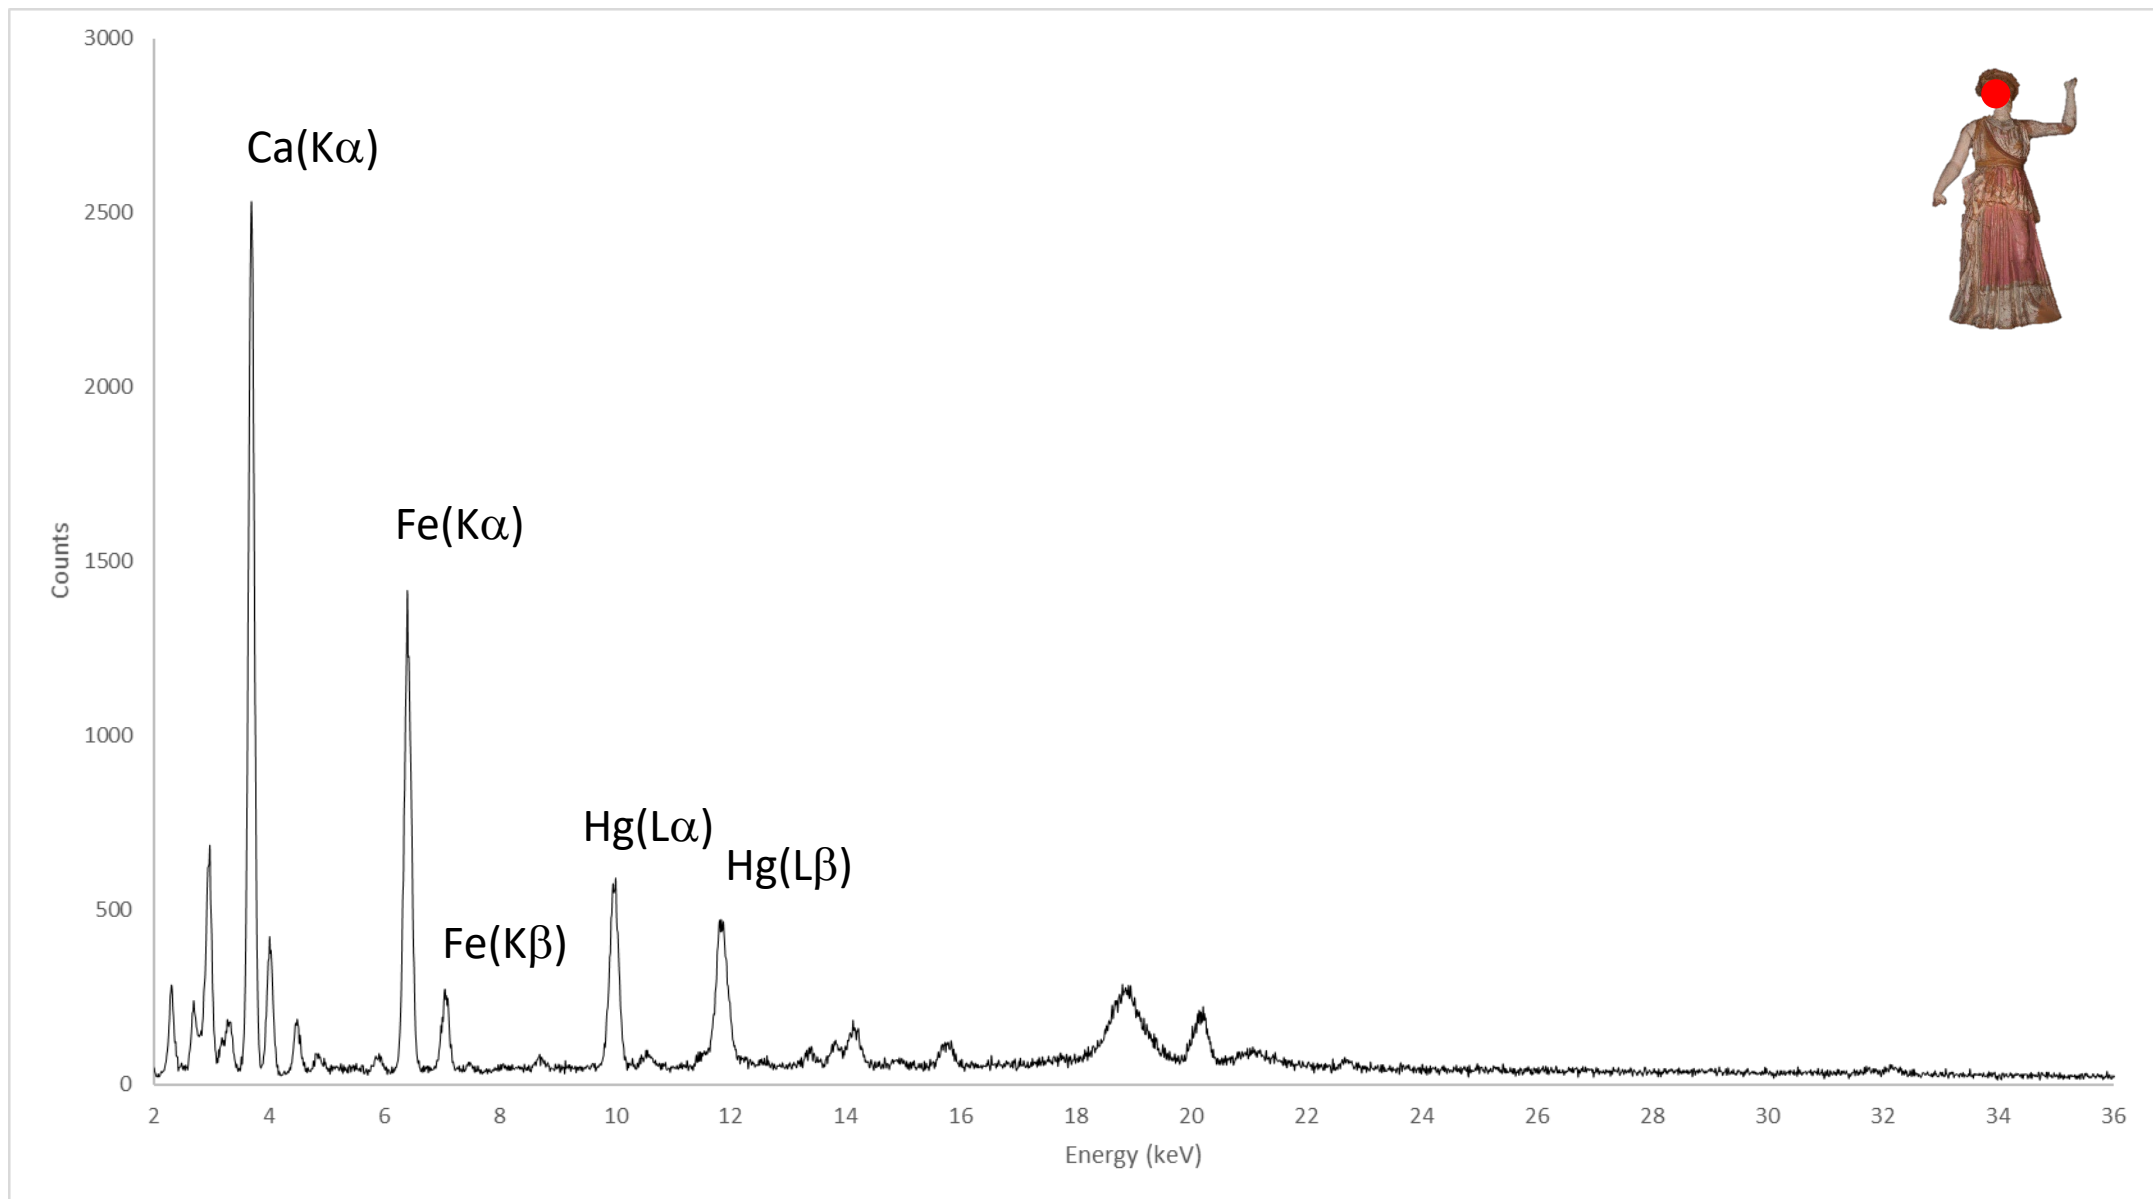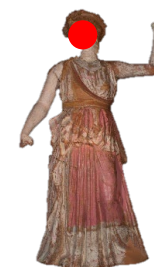

Spectrum: Lips

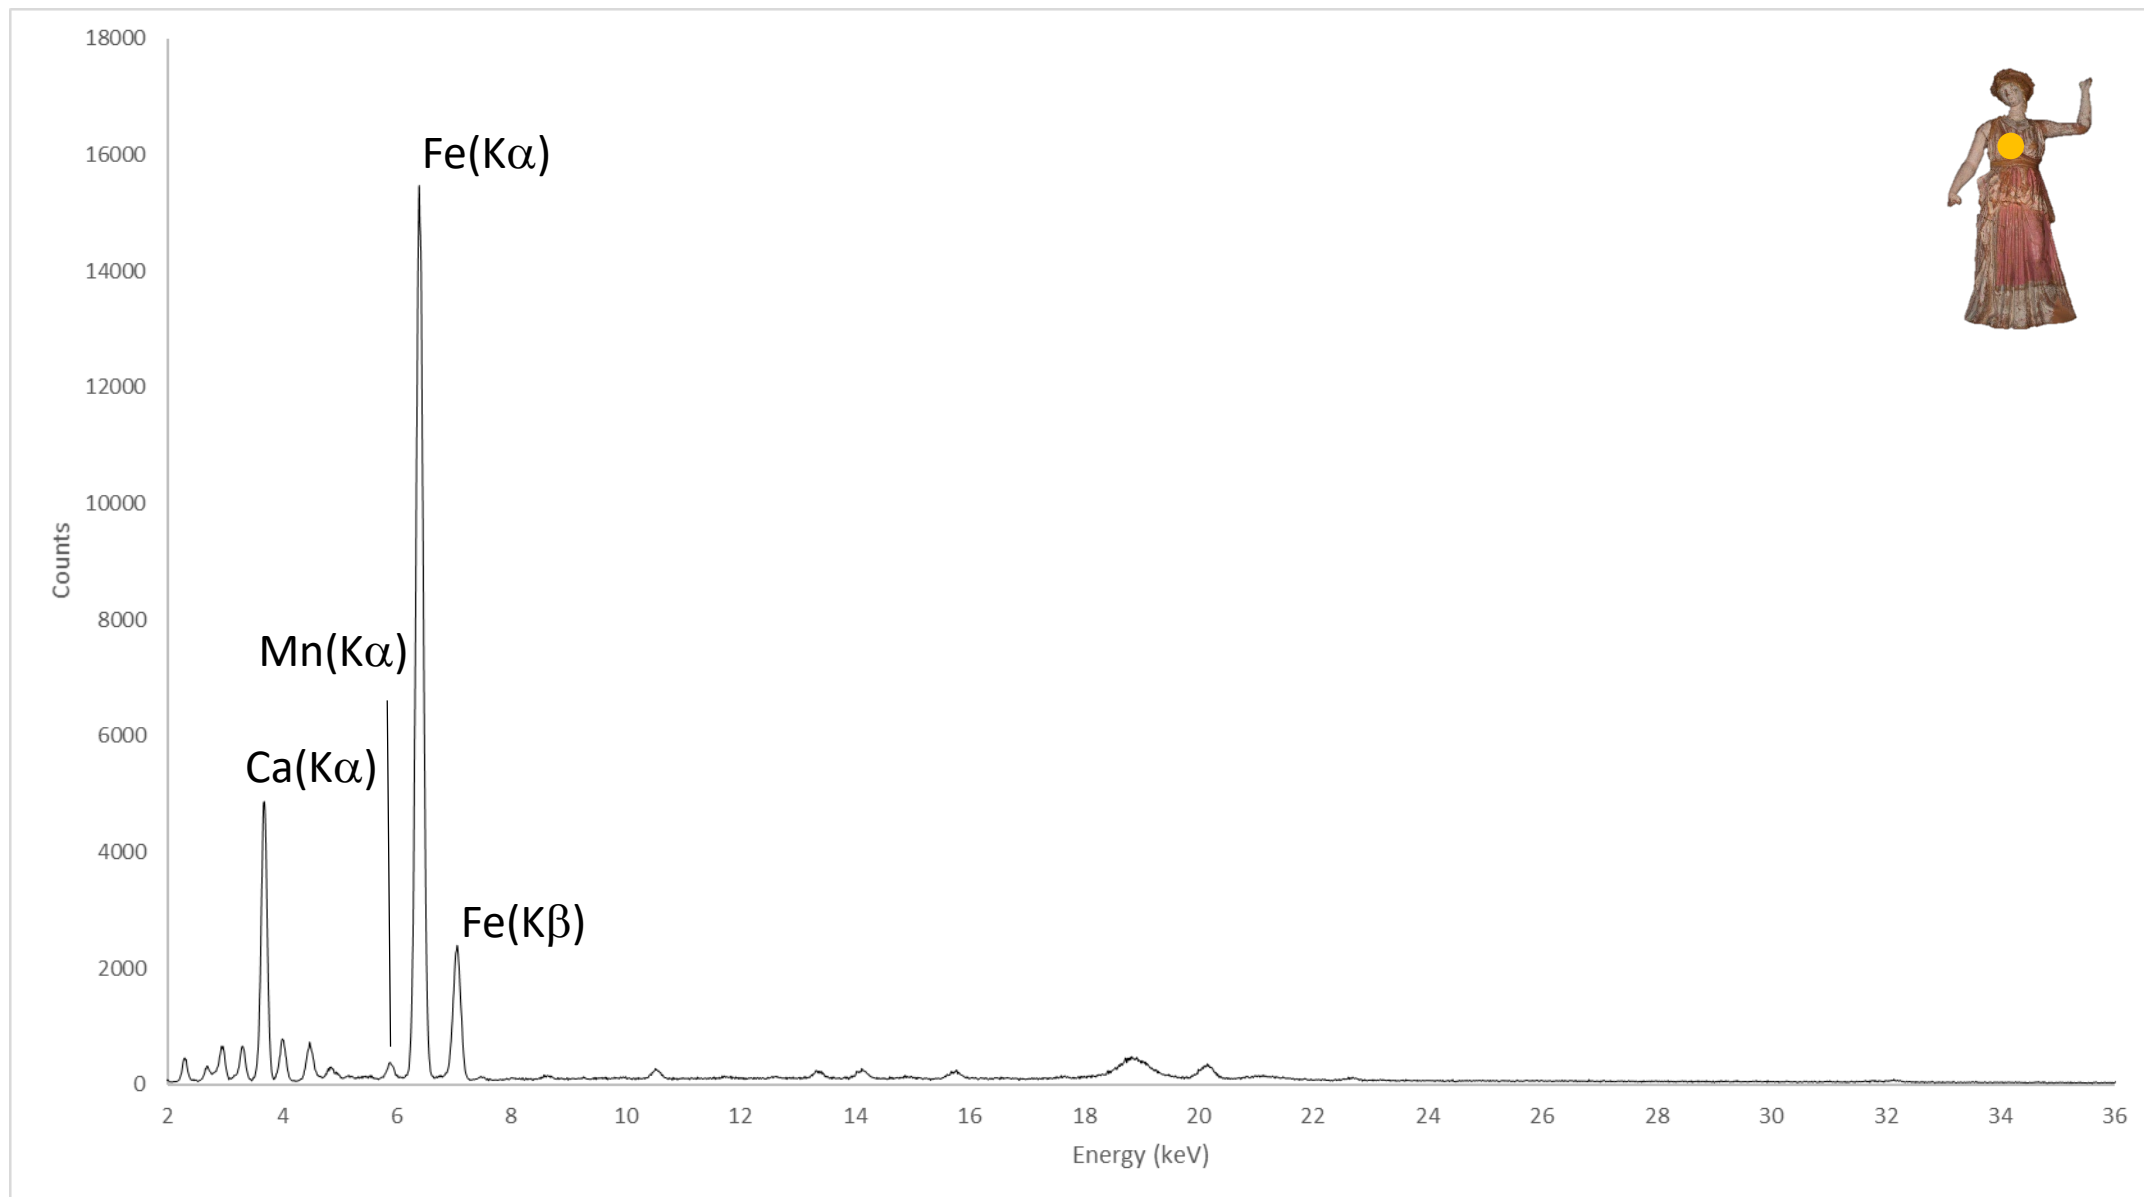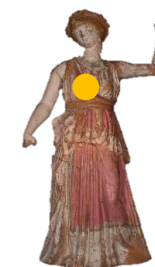

Spectrum: Yellow *Nebris*

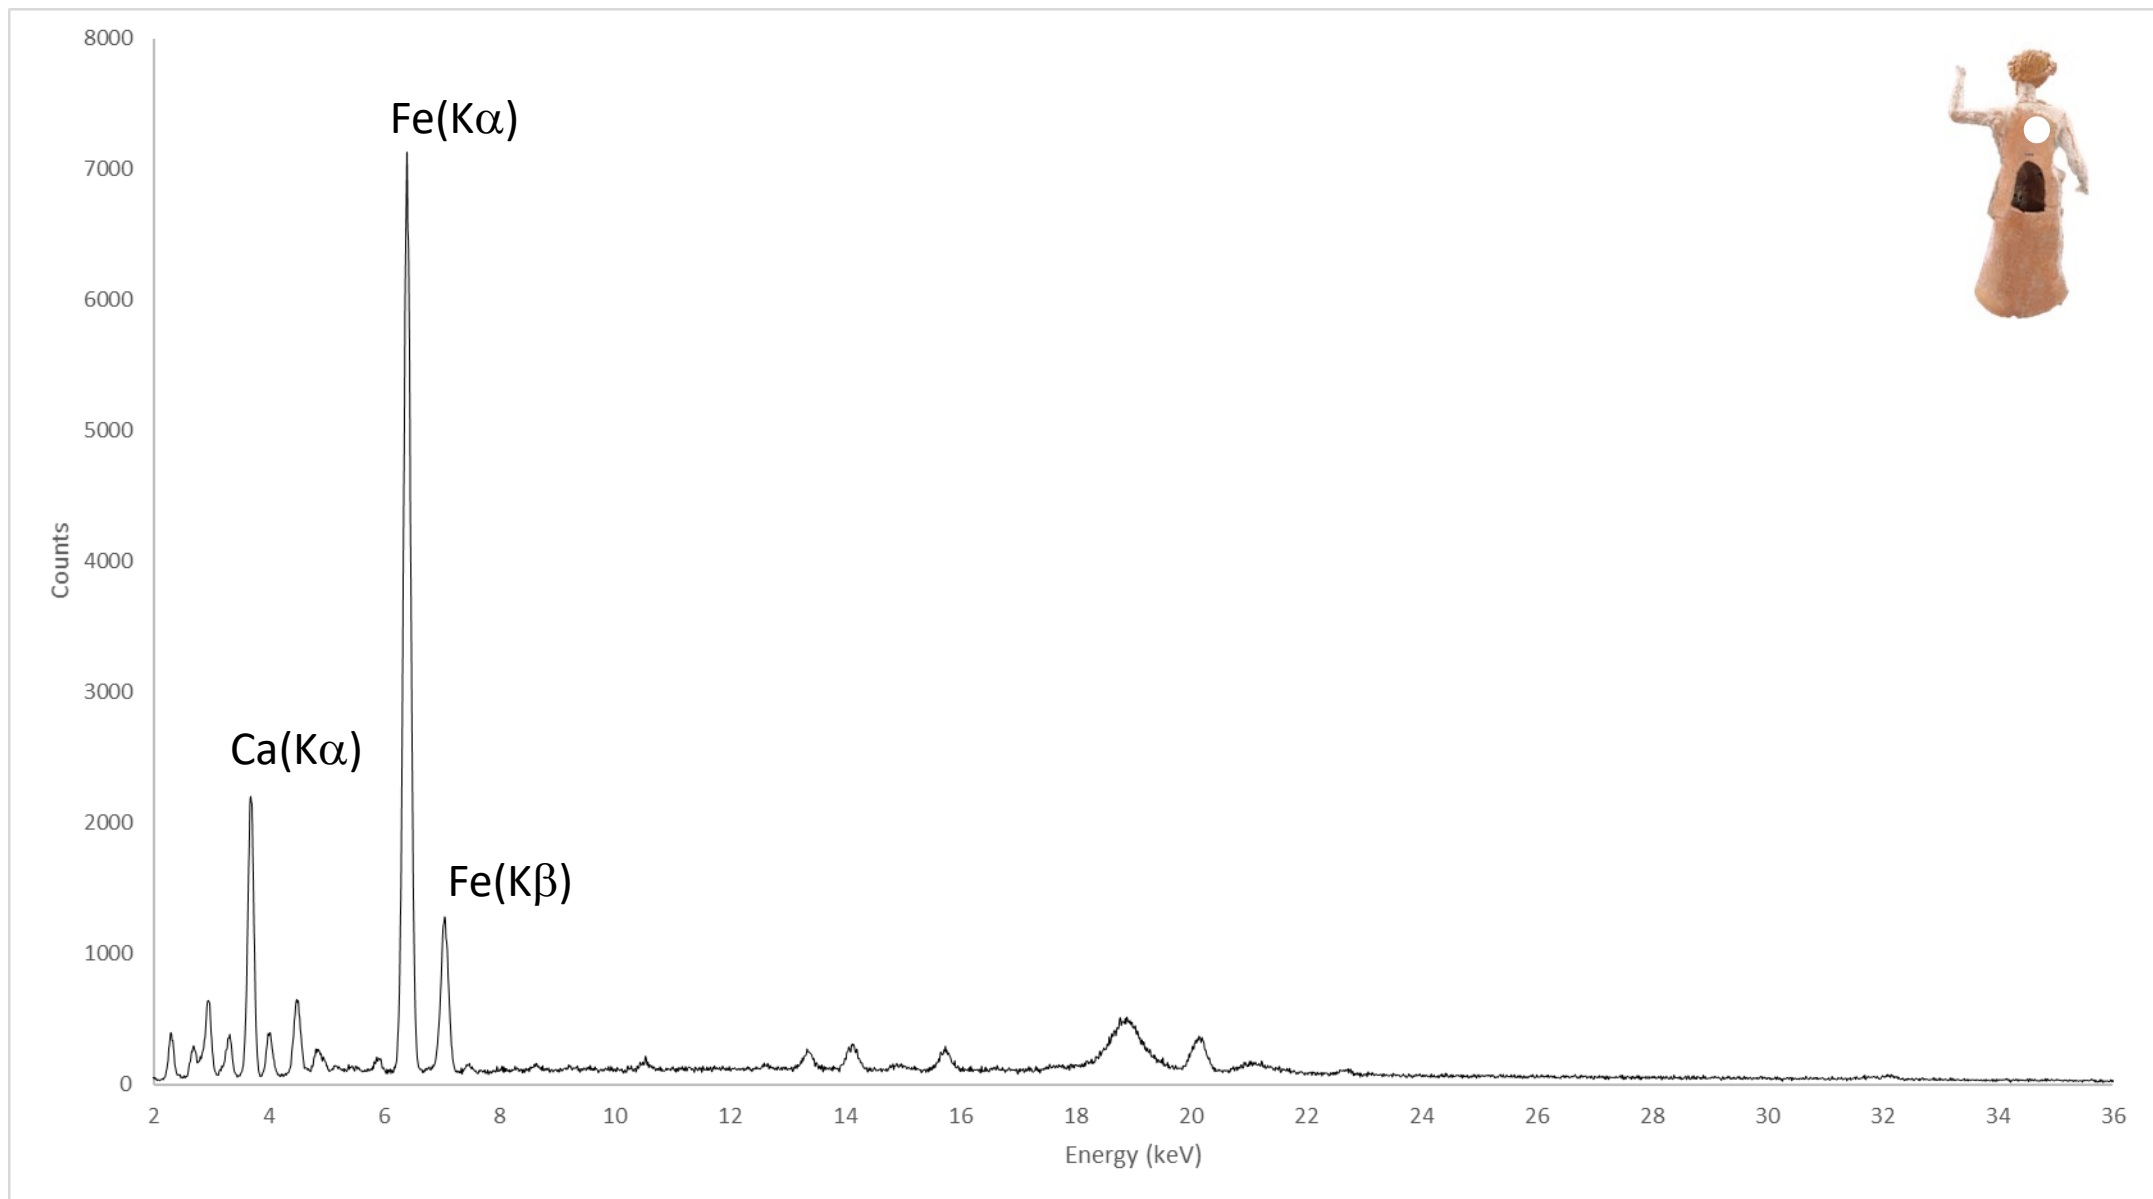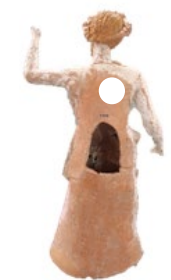

Spectrum: White preparation

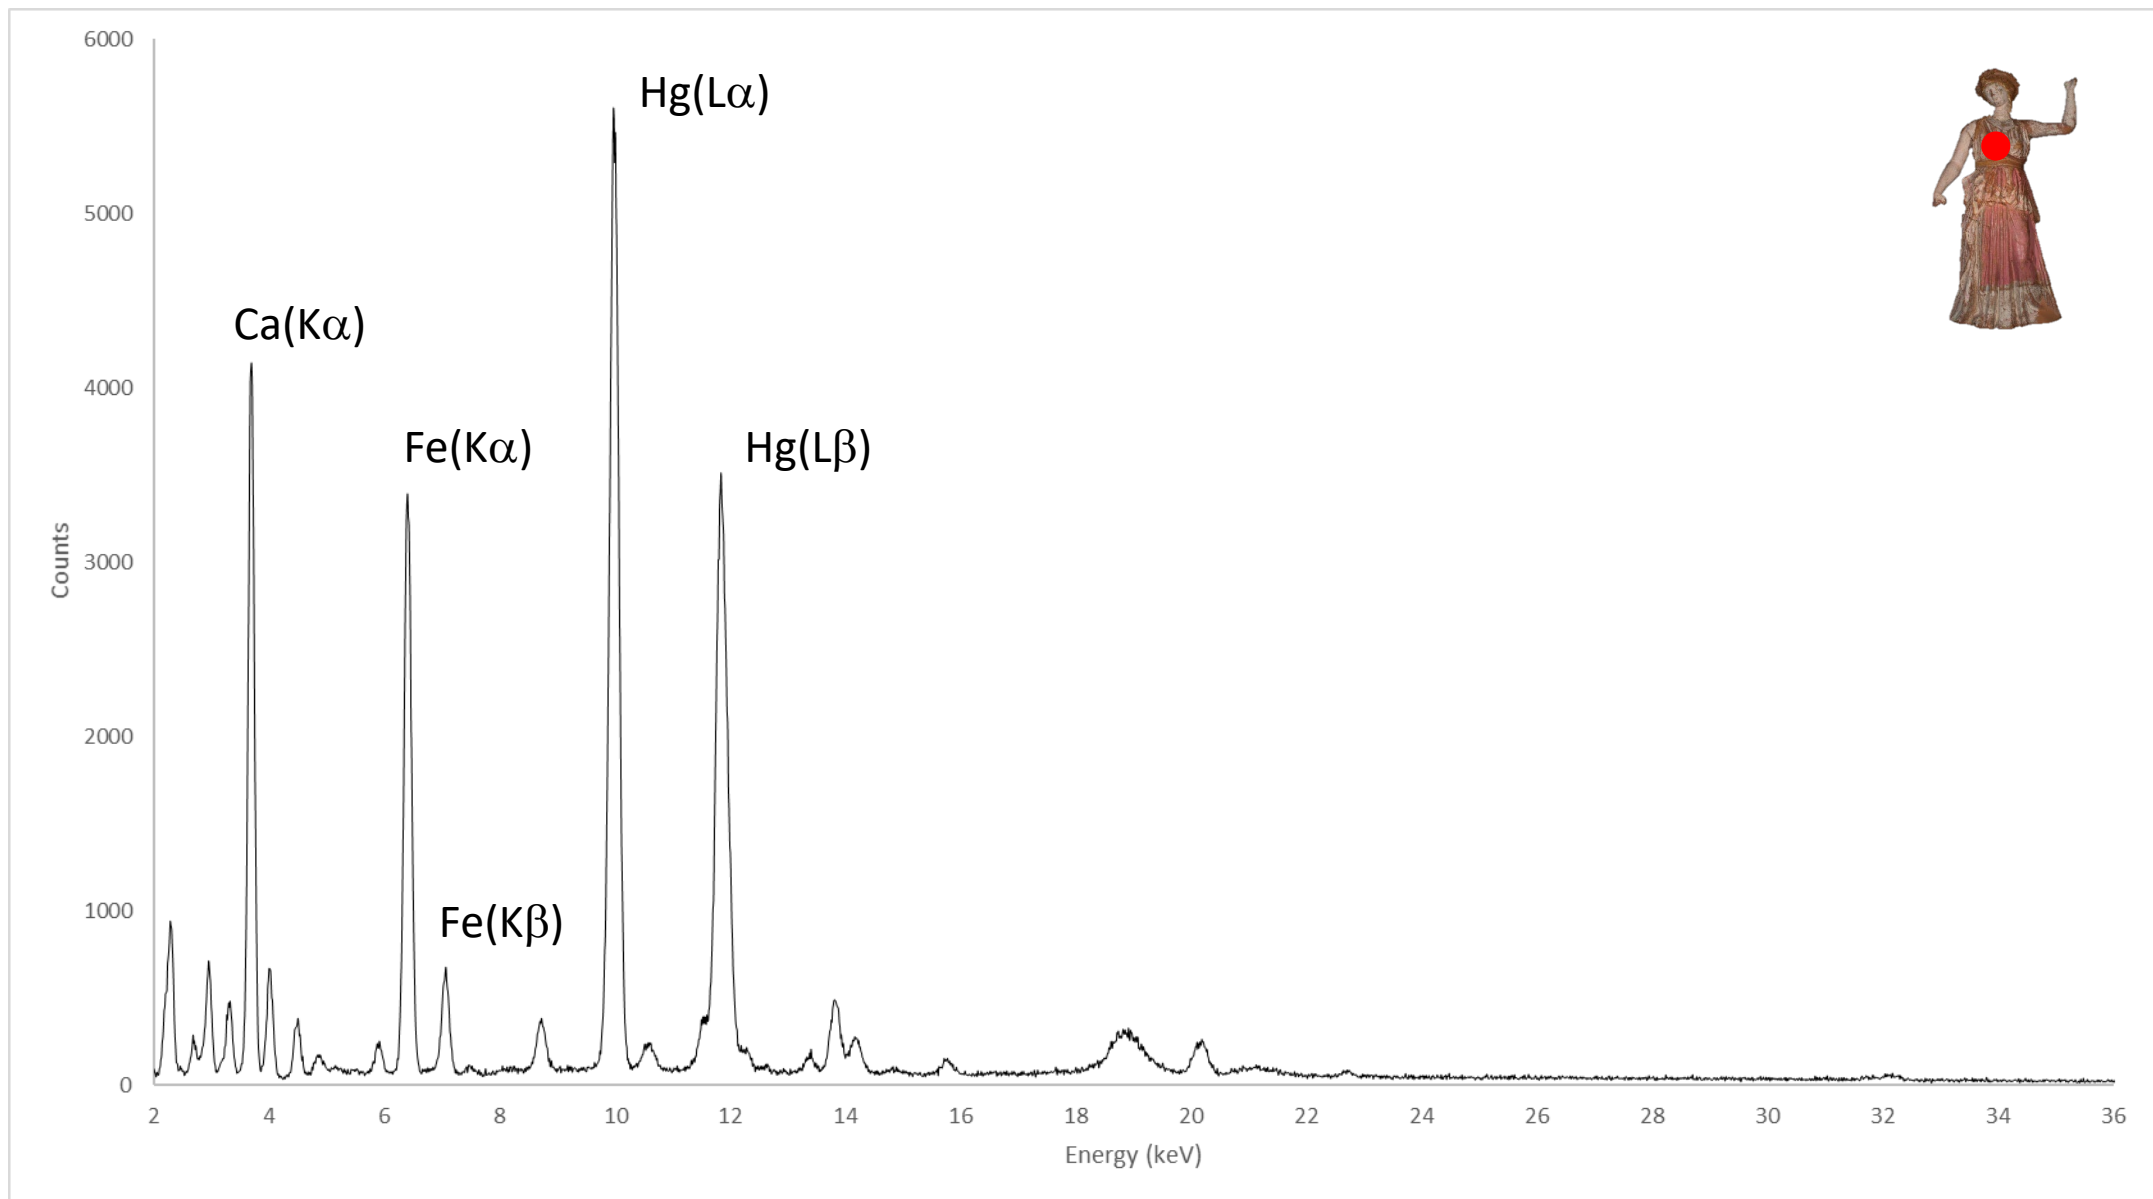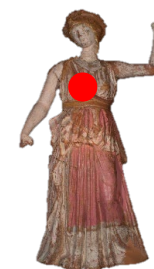

Spectrum: Red *Nebris*

Supplement: s1 [file s1]
